# Supplementary material for: Solvent-induced luminescence behavior of Ce/Eu@Gd-MOF for ratiometric detection of D2O in H2O
Source: Royal Society of Chemistry journal article supplement (doi:10.1039/d3tc04154a), 2023-11-30
Supplement: d3tc04154a1.pdf [file d3tc04154a1.pdf]

## Electronic Supplementary Information for Solvent-induced luminescence behavior of Ce/Eu@Gd-MOF for ratiometric detection for D<sub>2</sub>O in H<sub>2</sub>O

Xiaoxuan Fan,<sup>a</sup> Zhiqiang Guo,<sup>a</sup> Xiaokun Wen,<sup>b</sup> Wen Liu,<sup>a</sup> Baijie Guan,<sup>a</sup> Feifei Yin,<sup>a</sup> Xia Hong,<sup>b</sup> Tianya Tan,<sup>a</sup> Kexin Wang,<sup>a,\*</sup> Jiwei Wang,<sup>a,\*</sup>

<sup>a</sup> College of Physics, Liaoning University, Shenyang, 110036, China

<sup>b</sup> Key Laboratory of UV-Emitting Materials and Technology (Northeast Normal University), Ministry of Education, Changchun, 130024, China

E-mail: wyf93jl@163.com (Kexin Wang); wangjiwei@lnu.edu.cn (Jiwei Wang)

### Emission spectra of Eu@Gd-MOF and Ce/Eu@Gd-MOF

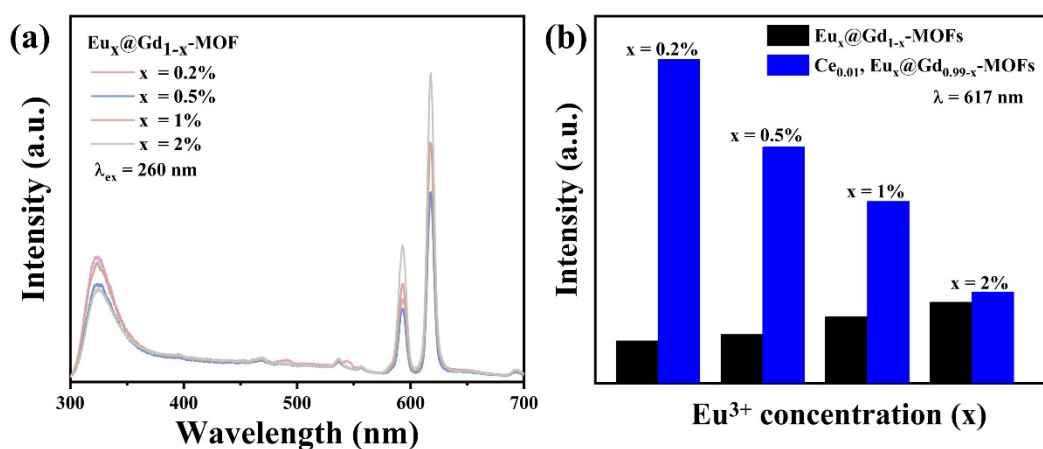

**Fig. S1** (a) Emission spectra of Eu<sub>x</sub>@Gd<sub>1-x</sub>-MOFs (x = 0.002, 0.005, 0.01, 0.02) samples ( $\lambda_{ex} = 260$  nm). (b) The comparison of the luminescence intensity between Eu<sup>3+</sup> doped and Ce<sup>3+</sup>/Eu<sup>3+</sup> co-doped in Gd-MOFs

Fig. S1a depicts the emission spectra of sample Eu<sub>x</sub>@Gd<sub>1-x</sub>-MOFs (x = 0, 0.002, 0.005, 0.01, 0.02) and Ce<sub>0.01</sub>/Eu<sub>x</sub>@Gd<sub>0.99-x</sub>-MOFs (x = 0.002, 0.005, 0.01, 0.02) under the same testing conditions. Fig. S1b shows the luminescence of the samples at 617 nm, where the emission intensity of the Eu@Gd-MOFs samples are lower than Ce<sub>0.01</sub>/Eu@Gd-MOFs, due probably to the energy transfer between the Ce<sup>3+</sup> and the

Eu<sup>3+</sup> units.

**Emission intensity at 617 nm of Ce/Eu@Gd-MOFs in solvents**

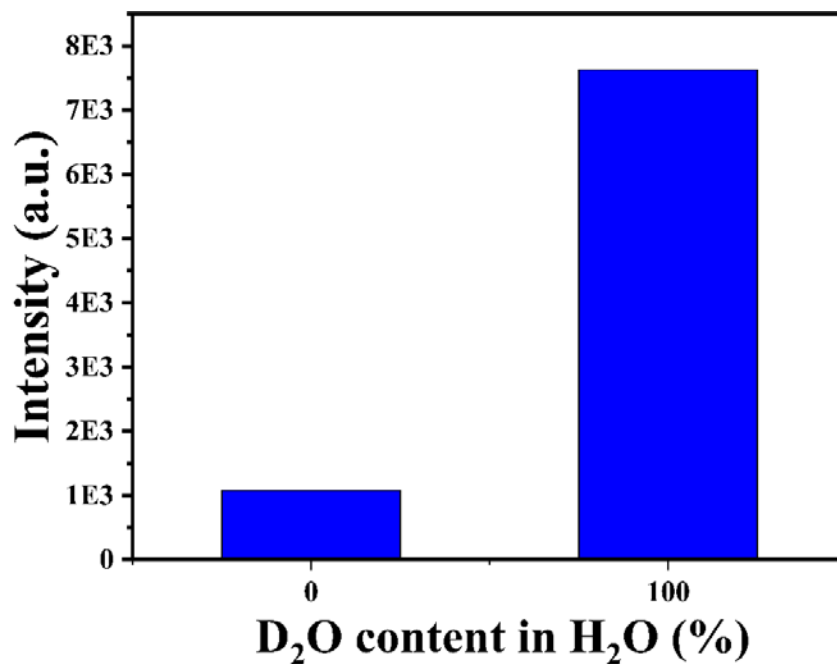

**Fig. S2** Emission intensity at 617 nm of Ce/Eu@Gd-MOFs dispersing in H<sub>2</sub>O and D<sub>2</sub>O

**Energy transfer efficiency of Ce/Eu@Gd-MOFs in H<sub>2</sub>O and D<sub>2</sub>O**

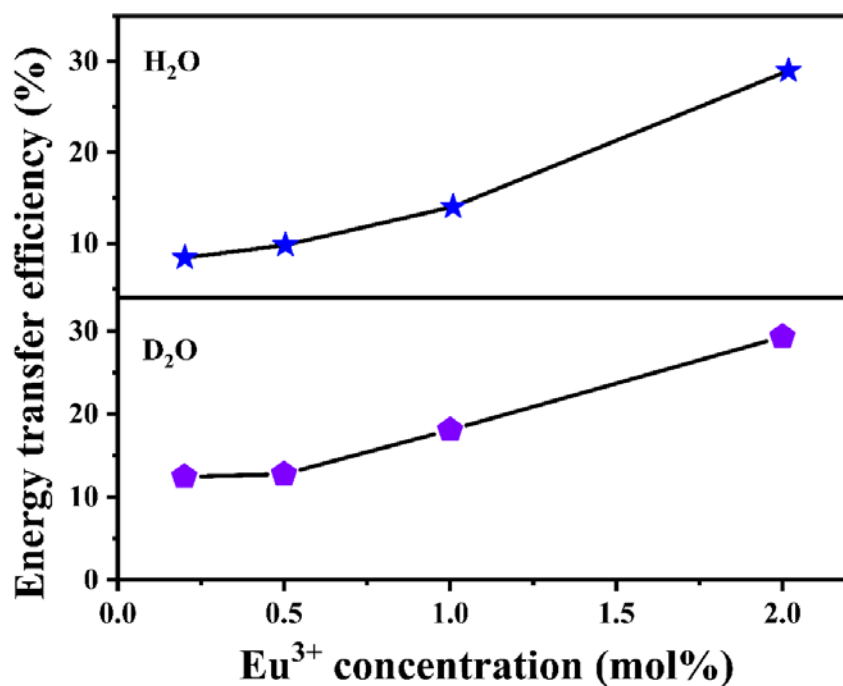

**Fig. S3** Energy transfer efficiency of Ce/Eu@Gd-MOFs in H<sub>2</sub>O and D<sub>2</sub>O.

### Selectivity of Ce/Eu@Gd-MOFs for D<sub>2</sub>O detection

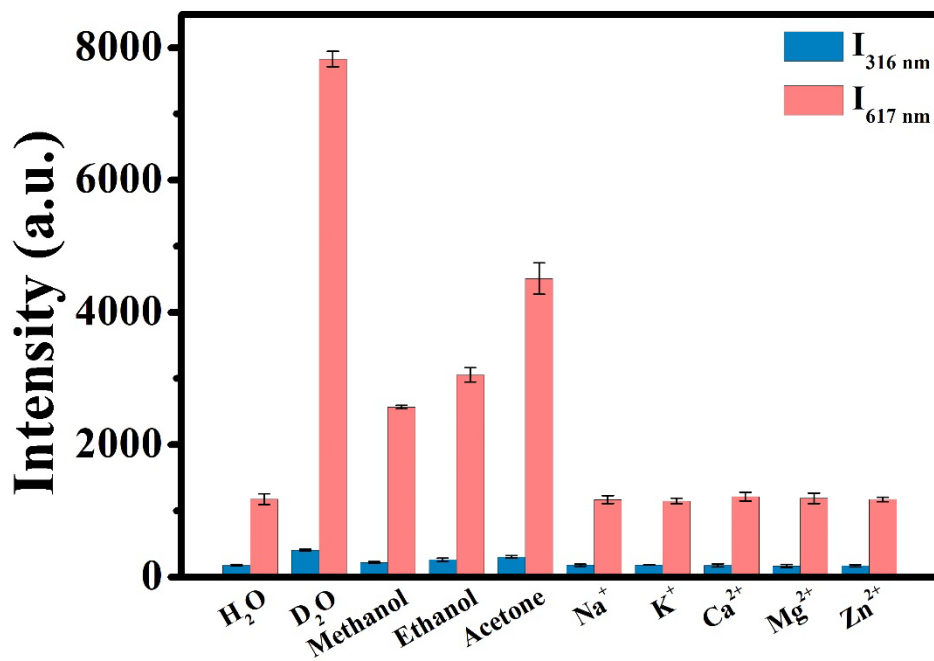

**Fig. S4** Emission intensity at 316 nm and 617 nm of Ce/Eu@Gd-MOF dispersion in the presence of other common species (Na<sup>+</sup>, K<sup>+</sup>, Ca<sup>2+</sup>, Mg<sup>2+</sup>, Zn<sup>2+</sup>, methanol, ethanol and acetone). The ion concentration is 1 mM.
